# Supplementary material for: Sex-Specific Mediation Effects of Workplace Bullying on Associations between Employees’ Weight Status and Psychological Health Impairments
Source: MDPI journal article supplement (doi:10.3390/nu13113867), 2021-10-29
Supplement: s1 [file s1]

**Sex-specific mediation effects of workplace bullying on associations between employees'  
weight status and psychological health impairments**

Supplementary Materials

Supplementary Table S1

*Sex-specific experiences of workplace bullying and psychological health impairments across  
the weight status: Mean values and standard deviations*

| Variable         | Total sample<br>( <i>n</i> = 1 290) |        |        | Women<br>( <i>n</i> = 630, 48.8%) |        |        | Men<br>( <i>n</i> = 660, 51.2%) |        |        |
|------------------|-------------------------------------|--------|--------|-----------------------------------|--------|--------|---------------------------------|--------|--------|
| Weight status    | NW                                  | OW     | OB     | NW                                | OW     | OB     | NW                              | OW     | OB     |
| <i>n</i>         | 714                                 | 494    | 82     | 417                               | 168    | 45     | 297                             | 326    | 37     |
| Workplace        | 4.65                                | 4.85   | 5.16   | 4.65                              | 4.87   | 5.38   | 4.65                            | 4.84   | 4.89   |
| bullying (MOB-K) | (1.43)                              | (1.80) | (2.01) | (1.42)                            | (1.84) | (2.20) | (1.45)                          | (1.79) | (1.74) |
| Burnout symptoms | 0.45                                | 0.49   | 0.84   | 0.49                              | 0.55   | 0.99   | 0.40                            | 0.46   | 0.66   |
| (BOSS-II)        | (0.57)                              | (0.59) | (0.80) | (0.61)                            | (0.60) | (0.80) | (0.51)                          | (0.59) | (0.77) |
| Quality of life  | 24.23                               | 24.08  | 22.88  | 24.10                             | 23.87  | 22.42  | 24.40                           | 24.19  | 23.43  |
| (EQ-5D)          | (1.49)                              | (1.64) | (2.43) | (1.63)                            | (0.55) | (2.55) | (1.24)                          | (1.56) | (2.17) |

*Notes.* Weight status groups, according to the BMI (body mass index, kg/m<sup>2</sup>): NW = Normal weight ( $18.5 \leq \text{BMI} < 25.0 \text{ kg/m}^2$ ), OW = Overweight ( $25.0 \leq \text{BMI} < 30.0 \text{ kg/m}^2$ ), OB = Obesity ( $\text{BMI} \geq 30.0 \text{ kg/m}^2$ ); MOB-K = Intensity of Bullying Coming from Co-Workers scale sum score (4 – 16\*, less favorable scores are asterisked; Pfaff, Bentz & Brähler, 2007); BOSS II = Burnout Screening Scale II mean score (0 – 5\*; Hagemann & Geuenich, 2009); EQ-5D = EuroQoL 5 Item-index sum score (5\* – 25; Hinz, Kohlmann, Stöbel-Richter, Zenger, & Brähler, 2014; Janssen et al., 2013).
